# Supplementary material for: Ru(ii) and Os(ii) mixed-chelates derived from imidazole-4,5-dicarboxylic acid and 2,2′-bipyridine as colorimetric sensors for anions: synthesis, characterization and binding studies
Source: Royal Society of Chemistry journal article supplement (doi:10.1039/b924561h), 2010-01-01
Supplement: b924561h.pdf [file b924561h.pdf]

### **Figure captions for Supplementary Information**

**Fig. S1** Changes of UV-Vis spectra of sensor **1** in CH<sub>3</sub>CN upon the addition of AcO<sup>-</sup> (a) and H<sub>2</sub>PO<sub>4</sub><sup>-</sup> ions (b) The inset shows the change of absorbance at 525 nm as a function of the equivalents of anion added.

**Fig. S2** Changes of UV-Vis spectra of sensor **2** in CH<sub>3</sub>CN upon the addition of AcO<sup>-</sup> (a) and H<sub>2</sub>PO<sub>4</sub><sup>-</sup> (b) The inset shows the change of absorbance at 540 nm as a function of the equivalents of anion added.

**Fig. S3** Time-resolved photoluminescence decay trace of **1** in CH<sub>3</sub>CN at room temperature, obtained with 440 nm excitation.

**Fig. S4** Changes of photoluminescence intensity of **1** in CH<sub>3</sub>CN upon the addition of H<sub>2</sub>PO<sub>4</sub><sup>-</sup> (a) and AcO<sup>-</sup> (b) ions. The inset shows the photoluminescence intensity change as a function of the equivalent of anion added.

**Fig. S5** Cyclic voltammograms of **1** (a) and **2** (b) in the presence and absence of TBAF in CH<sub>3</sub>CN.

### Figures for Supplementary Information

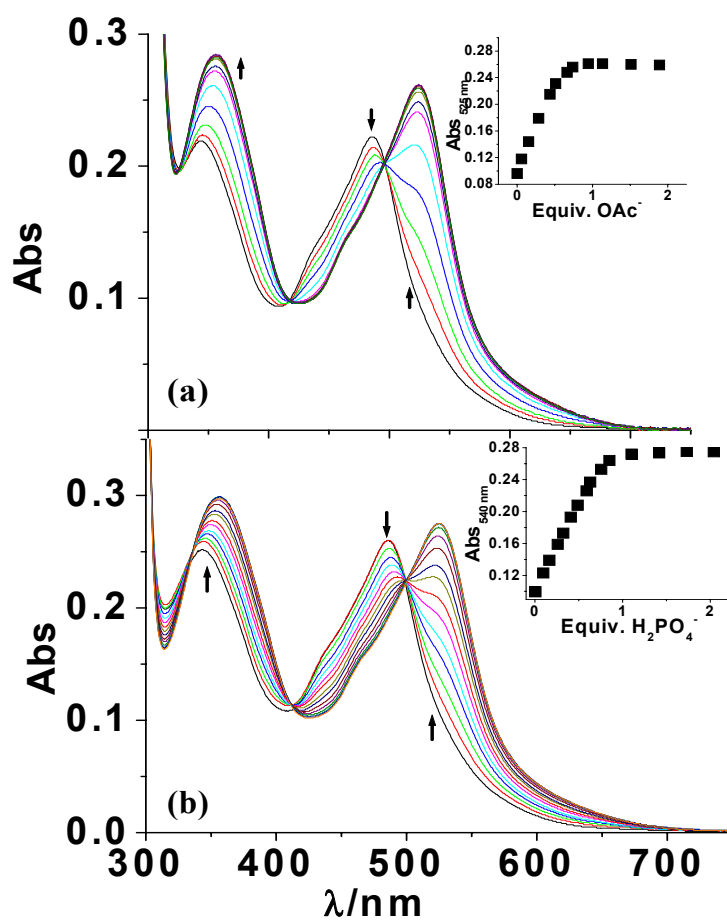

Fig. S1

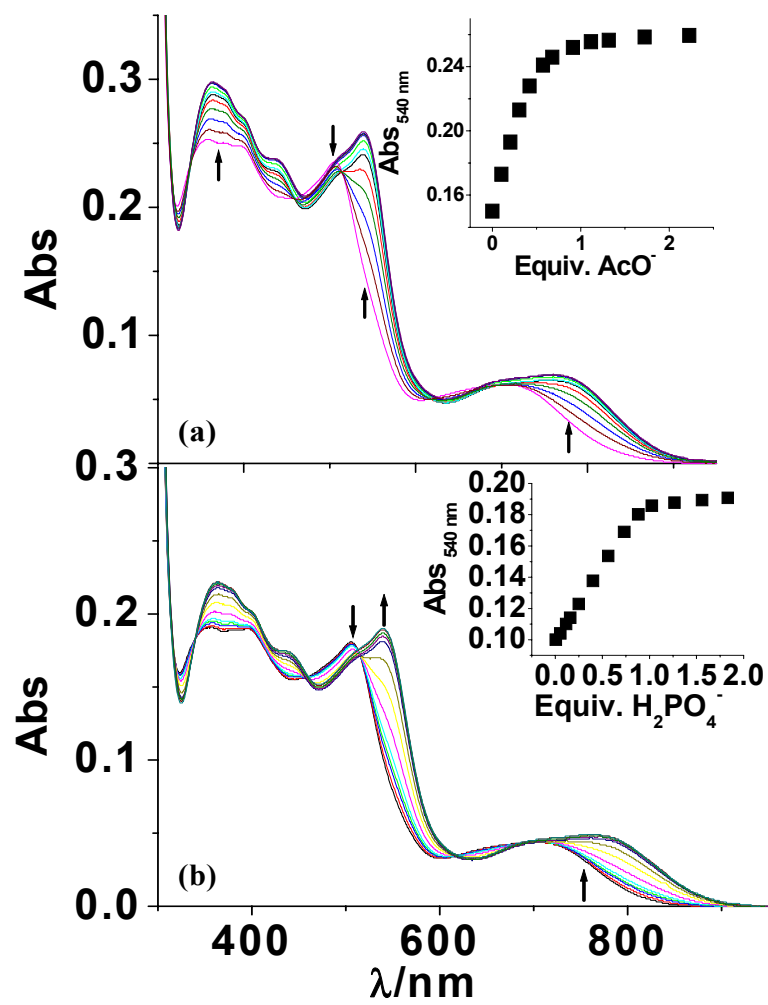

Fig. S2

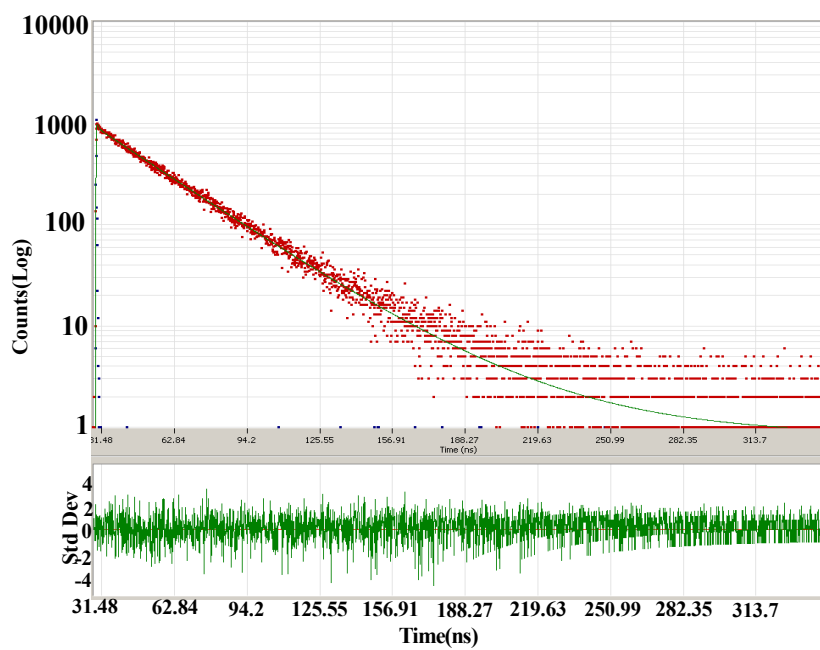

Fig. S3

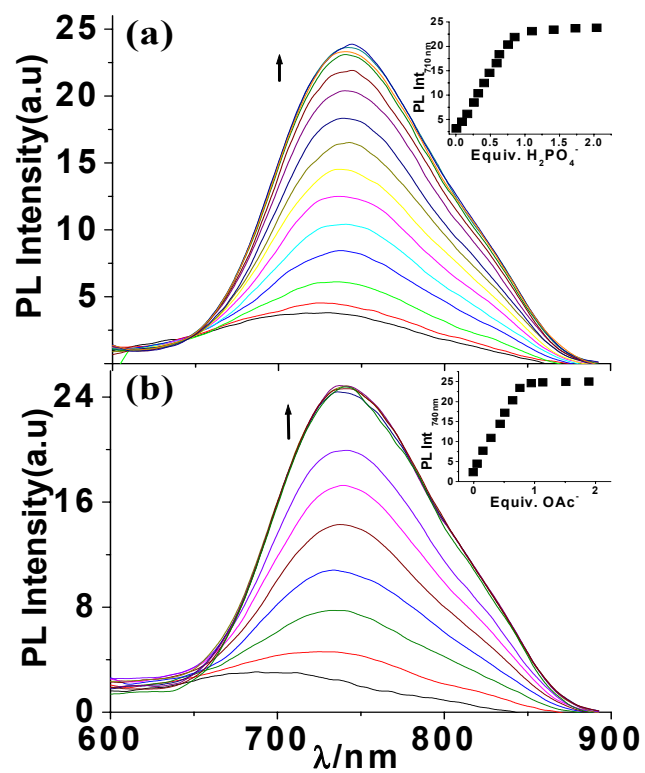

Fig. S4

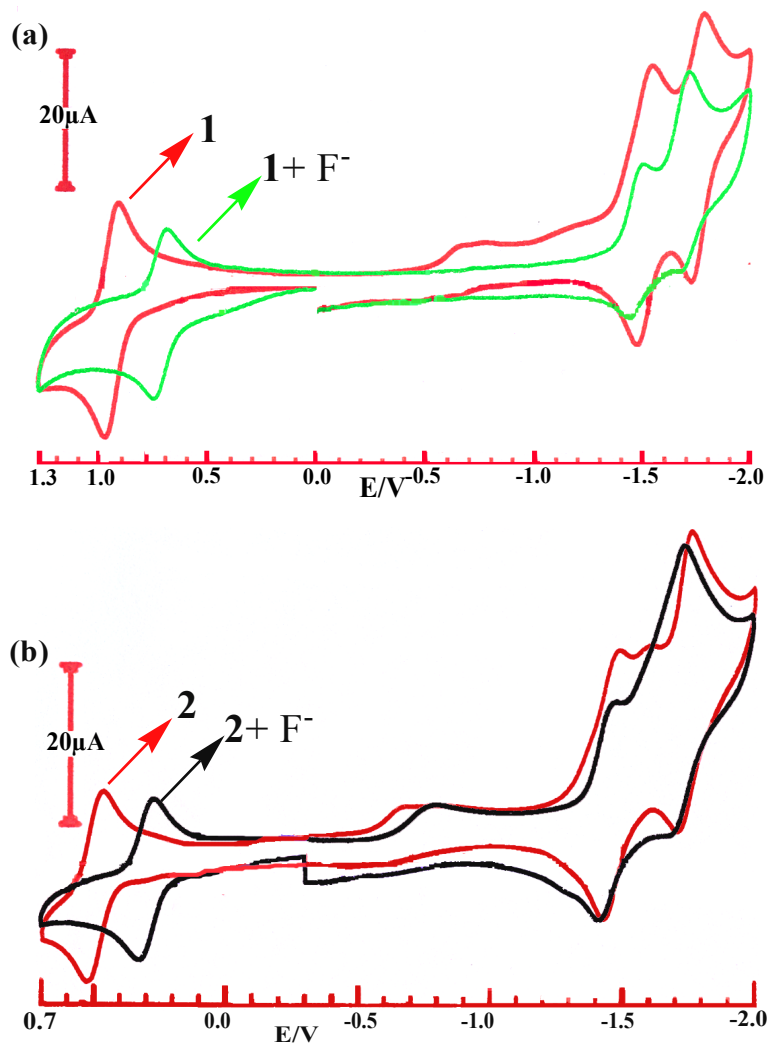

Fig. S5
